# Supplementary material for: Asymmetric transfer hydrogenation by synthetic catalysts in cancer cells
Source: Springer Nature journal article supplement (doi:10.1038/nchem.2918), 2018-01-08
Supplement: 41557_2018_BFnchem2918_MOESM29_ESM.mol [file 41557_2018_BFnchem2918_MOESM29_ESM.mol]

nchem.2918-comp8.mol
  ChemDraw12131709522D

 45 50  0  0  0  0  0  0  0  0999 V2000
    0.3880   -1.9272    0.0000 C   0  0  0  0  0  0  0  0  0  0  0  0
    1.2130   -1.9272    0.0000 C   0  0  0  0  0  0  0  0  0  0  0  0
    1.4680   -1.1426    0.0000 N   0  0  0  0  0  0  0  0  0  0  0  0
    0.8005   -0.6577    0.0000 Os  0  0  0  0  0  0  0  0  0  0  0  0
    0.1331   -1.1426    0.0000 N   0  0  0  0  0  0  0  0  0  0  0  0
   -0.0245   -2.6417    0.0000 C   0  0  0  0  0  0  0  0  0  0  0  0
    1.6255   -2.6417    0.0000 C   0  0  0  0  0  0  0  0  0  0  0  0
   -0.8495   -2.6417    0.0000 C   0  0  0  0  0  0  0  0  0  0  0  0
   -1.2620   -3.3562    0.0000 C   0  0  0  0  0  0  0  0  0  0  0  0
   -0.8495   -4.0706    0.0000 C   0  0  0  0  0  0  0  0  0  0  0  0
   -0.0245   -4.0706    0.0000 C   0  0  0  0  0  0  0  0  0  0  0  0
    0.3880   -3.3562    0.0000 C   0  0  0  0  0  0  0  0  0  0  0  0
    1.2130   -3.3562    0.0000 C   0  0  0  0  0  0  0  0  0  0  0  0
    1.6255   -4.0706    0.0000 C   0  0  0  0  0  0  0  0  0  0  0  0
    2.4505   -4.0706    0.0000 C   0  0  0  0  0  0  0  0  0  0  0  0
    2.8630   -3.3562    0.0000 C   0  0  0  0  0  0  0  0  0  0  0  0
    2.4505   -2.6417    0.0000 C   0  0  0  0  0  0  0  0  0  0  0  0
   -0.6515   -0.8877    0.0000 S   0  0  0  0  0  0  0  0  0  0  0  0
   -0.3966   -0.1030    0.0000 O   0  0  0  0  0  0  0  0  0  0  0  0
   -1.4362   -0.6327    0.0000 C   0  0  0  0  0  0  0  0  0  0  0  0
   -0.9065   -1.6723    0.0000 O   0  0  0  0  0  0  0  0  0  0  0  0
   -1.6077    0.1742    0.0000 C   0  0  0  0  0  0  0  0  0  0  0  0
   -2.3923    0.4292    0.0000 C   0  0  0  0  0  0  0  0  0  0  0  0
   -3.0054   -0.1228    0.0000 C   0  0  0  0  0  0  0  0  0  0  0  0
   -2.8339   -0.9298    0.0000 C   0  0  0  0  0  0  0  0  0  0  0  0
   -2.0493   -1.1848    0.0000 C   0  0  0  0  0  0  0  0  0  0  0  0
   -3.7900    0.1321    0.0000 C   0  0  0  0  0  0  0  0  0  0  0  0
    2.3740   -0.2089    0.0000 C   0  0  0  0  0  0  0  0  0  0  0  0
    2.2633   -1.0264    0.0000 C   0  0  0  0  0  0  0  0  0  0  0  0
    2.9159   -1.5311    0.0000 C   0  0  0  0  0  0  0  0  0  0  0  0
    3.6793   -1.2183    0.0000 C   0  0  0  0  0  0  0  0  0  0  0  0
    3.7900   -0.4007    0.0000 C   0  0  0  0  0  0  0  0  0  0  0  0
    3.1374    0.1040    0.0000 C   0  0  0  0  0  0  0  0  0  0  0  0
    1.7214    0.2958    0.0000 C   0  0  0  0  0  0  0  0  0  0  0  0
    1.8322    1.1134    0.0000 C   0  0  0  0  0  0  0  0  0  0  0  0
    1.1796    1.6181    0.0000 C   0  0  0  0  0  0  0  0  0  0  0  0
    0.4162    1.3052    0.0000 C   0  0  0  0  0  0  0  0  0  0  0  0
    0.3054    0.4877    0.0000 C   0  0  0  0  0  0  0  0  0  0  0  0
    0.9580   -0.0170    0.0000 C   0  0  0  0  0  0  0  0  0  0  0  0
    1.2904    2.4356    0.0000 C   0  0  0  0  0  0  0  0  0  0  0  0
    2.0537    2.7484    0.0000 C   0  0  0  0  0  0  0  0  0  0  0  0
    2.1645    3.5659    0.0000 C   0  0  0  0  0  0  0  0  0  0  0  0
    1.5119    4.0706    0.0000 C   0  0  0  0  0  0  0  0  0  0  0  0
    0.7485    3.7578    0.0000 C   0  0  0  0  0  0  0  0  0  0  0  0
    0.6377    2.9403    0.0000 C   0  0  0  0  0  0  0  0  0  0  0  0
  1  2  1  0      
  2  3  1  0      
  3  4  1  0      
  4  5  1  0      
  5  1  1  0      
  1  6  1  0      
  2  7  1  0      
  6  8  2  0      
  8  9  1  0      
  9 10  2  0      
 10 11  1  0      
 11 12  2  0      
 12  6  1  0      
  7 13  2  0      
 13 14  1  0      
 14 15  2  0      
 15 16  1  0      
 16 17  2  0      
 17  7  1  0      
  5 18  1  0      
 18 19  2  0      
 18 20  1  0      
 18 21  2  0      
 20 22  2  0      
 22 23  1  0      
 23 24  2  0      
 24 25  1  0      
 25 26  2  0      
 26 20  1  0      
 24 27  1  0      
 28 29  2  0      
 29 30  1  0      
 30 31  2  0      
 31 32  1  0      
 32 33  2  0      
 33 28  1  0      
 28 34  1  0      
 34 35  2  0      
 35 36  1  0      
 36 37  2  0      
 37 38  1  0      
 38 39  2  0      
 39 34  1  0      
 36 40  1  0      
 40 41  2  0      
 41 42  1  0      
 42 43  2  0      
 43 44  1  0      
 44 45  2  0      
 45 40  1  0      
M  END
